# Supplementary material for: Patterns of Gene Flow Define Species of Thermophilic Archaea
Source: PLoS Biol. 2012 Feb 21;10(2):e1001265. doi: 10.1371/journal.pbio.1001265 (PMC3283564; doi:10.1371/journal.pbio.1001265)
Supplement: Table S1 — List of S. islandicus strains. (XLSX) [file pbio.1001265.s004.xlsx]

## Sheet: Sheet1
Table S1. List of S. islandicus strains
Hot Spring Name	Media**	Number	Year	Temperature	pH		Hot Spring Name	Media*	Number	Year	Temperature	pH		Hot Spring Name	Media*	Number	Year	Temperature	pH
M.16		37	2000	76ºC	2		M.12		9	2000	96ºC	3.5		M.03		8	2010	71.8ºC	2.76
Strain Namea							Strain Namea							Strain Nameb
M.16.01.2000	DTS						M.12.04.2000	DTSO						M.03.0.02.2010	DT
M.16.02.2000	DTS						M.12.07.2000	DTSO						M.03.0.16.2010	DT
M.16.03.2000	DTS						M.12.08.2000	DTSO						M.03.0.27.2010	DT
M.16.04.2000	DTS						M.12.13.2000	DTS						M.03.0.42.2010	DT
M.16.05.2000	DTS						M.12.26.2000	DTS						M.03.0.50.2010	DT
M.16.06.2000	DTS						M.12.27.2000	DTS						M.03.1.05.2010	DTO
M.16.09.2000	DTO						M.12.35.2000	DTO						M.03.2.01.2010	DTS
M.16.10.2000	DT						M.12.37.2000	DTO						M.03.2.05.2010	DTS
M.16.12.2000	DT						M.12.46.2000	DT
M.16.13.2000	DT
M.16.14.2000	DT						Hot Spring Name	Media*	Number	Year	Temperature	pH		Hot Spring Name	Media*	Number	Year	Temperature	pH
M.16.15.2000	DT						M.14		9	2000	91ºC	3		M.04		6	2010	92.2ºC	2.98
M.16.17.2000	DT						Strain Namea							Strain Nameb
M.16.18.2000	DT						M.14.16.2000	DTSO						M.04.0.10.2010	DT
M.16.19.2000	DT						M.14.17.2000	DTSO						M.04.0.13.2010	DT
M.16.21.2000	DT						M.14.25.2000	DT						M.04.0.29.2010	DT
M.16.22.2000	DT						M.14.34.2000	DT						M.04.0.37.2010	DT
M.16.23.2000	DT						M.14.38.2000	DTO						M.04.1.01.2010	DTO
M.16.25.2000	DT						M.14.39.2000	DTO						M.04.1.04.2010	DTO
M.16.26.2000	DT						M.14.46.2000	DTO
M.16.27.2000	DT						M.14.p01.2000	DT
M.16.28.2000	DTO						M.14.p06.2000	DT
M.16.30.2000	DTO
M.16.32.2000	DTO						Hot Spring Name	Media*	Number	Year	Temperature	pH		Hot Spring Name	Media*	Number	Year	Temperature	pH
M.16.33.2000	DTO						M.01		6	2010	93.5ºC	3.98		M.05		7	2010	81ºC	2.5
M.16.34.2000	DTO						Strain Nameb							Strain Nameb
M.16.36.2000	DTO						M.01.0.02.2010	DT						M.05.0.01.2010	DT
M.16.37.2000	DTO						M.01.1.02.2010	DTO						M.05.0.25.2010	DT
M.16.38.2000	DTO						M.01.1.03.2010	DTO						M.05.0.30.2010	DT
M.16.40.2000	DTS						M.01.2.01.2010	DTS						M.05.0.43.2010	DT
M.16.41.2000	DTS						M.01.2.04.2010	DTS						M.05.1.05.2010	DTO
M.16.42.2000	DTS						M.01.3.02.2010	DTSO						M.05.2.03.2010	DTS
M.16.43.2000	DTS													M.05.3.04.2010	DTSO
M.16.44.2000	DTS
M.16.45.2000	DTSO						Hot Spring Name	Media*	Number	Year	Temperature	pH		Hot Spring Name	Media*	Number	Year	Temperature	pH
M.16.46.2000	DTSO						M.02		10	2010	92.4ºC	2.79		M.06		5	2010	78ºC	3.2
M.16.47.2000	DTSO						Strain Nameb							Strain Nameb
							M.02.0.16.2010	DT						M.06.0.06.2010	DT
							M.02.0.20.2010	DT						M.06.0.08.2010	DT
							M.02.0.30.2010	DT						M.06.1.01.2010	DTO
							M.02.0.33.2010	DT						M.06.1.04.2010	DTO
							M.02.0.37.2010	DT						M.06.2.04.2010	DTS
							M.02.1.06.2010	DTO
							M.02.1.13.2010	DTO
							M.02.2.07.2010	DTS
							M.02.2.19.2010	DTS
							M.02.3.11.2010	DTSO
a Strain name as in [12] with the format M.springnumber.strainnumber.year, b Strain name M.springnumber.mediacode.strainnumber.year, c Media used for strain isolation DT (Dextrin Tryptone (0)), DTO (Dextrin Tryptone Overlay (1)), DTS (Dextrin Trypton Sulfur (2)), DTSO (Dextrin Tryptone Sulfur Overlay (3))
