# Supplementary material for: Patterns of Gene Flow Define Species of Thermophilic Archaea
Source: PLoS Biol. 2012 Feb 21;10(2):e1001265. doi: 10.1371/journal.pbio.1001265 (PMC3283564; doi:10.1371/journal.pbio.1001265)
Supplement: Table S2 — MLSA allele assignment for S. islandicus strains. (XLSX) [file pbio.1001265.s005.xlsx]

## Sheet: BetweenspringsTable
Table S2: Pairwise Fst values for each hot spring sample calculated from 7 concatenated loci.
		2000			2010
	Spring name	M.12	M.14	M.16	M.01	M.02	M.03	M.04	M.05	M.06
2000	M.12
	M.14	0.1701
	M.16	0.03457	0.16716
2010	M.01	0.0877	0.17777	0.05922
	M.02	0.12296	0.27926	-0.02197	0.13996
	M.03	-0.07616	0.07383	0.01874	-0.02628	0.11
	M.04	0.24347	0.19252	0.17251	0.06854	0.18394	0.16422
	M.05	0.11	0.15534	2e-05	-0.02677	-0.02095	0.04462	-0.05298
	M.06	0.16993	0.31725	0.10777	0.24364	0.22733	0.08485	0.35708	0.21081
Bold indicates significant values (p < 0.05) from 50,000 permutations.
