# Supplementary material for: Patterns of Gene Flow Define Species of Thermophilic Archaea
Source: PLoS Biol. 2012 Feb 21;10(2):e1001265. doi: 10.1371/journal.pbio.1001265 (PMC3283564; doi:10.1371/journal.pbio.1001265)
Supplement: Table S3 — Pairwise FST values for each hot spring sample calculated from seven concatenated MLSA loci. (XLSX) [file pbio.1001265.s006.xlsx]

## Sheet: chunk.table.pretty
Table S3: Variable genome segments among twelve S. islandicus genomes.
	longest genomeA						Blue							Red
#		startA	stopA	IDB	CC	v/plD	27	46	13	23	43	47	30	2	40	4	12	22
1	M.16.43	1328805	1375984	0.9939	0.6615	pl	x	x	x	x	x	x	x
2	M.16.02	332619	350192	0.9971	0.9312									x	x	x
3	M.16.12	320292	328621	0.9992	1.0001		x	x	x	x	x	x	x				x	x
4	M.16.46	796667	819019	0.998	0.9265		x	x	x	x	x	x	x				x	x
5	M.16.43	2550961	2557440	NA	NA						x
6	M.16.43	120472	126579	NA	NA	v/pl					x
7	M.16.02	880869	896980	NA	NA									x
8	M.16.02	1754282	1762523	NA	NA	v								x
9	M.16.02	1937920	1943813	NA	NA									x
10	M.16.02	2188234	2198254	NA	NA									x
11	M.16.02	2537225	2542965	NA	NA									x
12	M.16.40	969022	980837	NA	NA										x
13	M.16.40	2365461	2412036	NA	NA	pl									x
14	M.16.4	822029	834476	NA	NA											x
15	M.16.4	697086	711365	NA	NA	v										x
16	M.16.4	847308	861168	NA	NA	v										x
17	M.16.12	944835	953351	0.9932	0.8042		x	x	x	x	x	x	x				x	x
18	M.16.27	839346	849937	0.9933	0.3364		x	x	x	x	x	x	x				x	x
19	M.16.27	2213323	2220222	0.9996	1		x	x	x	x	x	x	x	x	x	x
20	M.16.12	1878081	1888617	0.9998	1.0001												x	x
21	M.16.12	2096739	2104716	0.9996	1.0003												x	x
22	M.16.12	1366682	1373298	1	1	v											x	x
23	M.16.12	1338064	1349386	1	1	v											x	x
24	M.16.12	2416084	2425929	1	1												x	x
25	M.16.12	2642638	2650420	0.9995	1.0001												x	x
26	M.16.12	1829710	1836982	0.9982	0.5584												x	x
27	M.16.02	957285	991364	0.9943	0.4235									x	x	x
28	M.16.02	738360	750609	0.9976	0.8752									x	x	x
29	M.16.27	849938	882606	0.9997	1.0001		x	x
30	M.16.30	734647	758097	0.9986	0.8733	pl	x	x	x	x	x	x	x	x			x	x
31	M.16.12	2216083	2232767	0.9955	0.8967		x	x	x	x	x	x	x		x	x	x	x
32	M.16.47	1660787	1667368	0.9905	0.816						x	x
33	M.16.4	1269296	1275302	1	1	v									x	x
34	M.16.40	1499314	1543844	0.9998	0.9808	pl									x	x
35	M.16.27	1044116	1053984	0.9998	1		x	x	x								x	x
36	M.16.13	346322	361377	0.9188	0.8207	v	x	x	x					x
37	M.16.12	119092	125473	0.9998	1	v/pl		x									x	x
38	M.16.22	1207826	1214547	0.9996	1					x				x	x	x	x	x
39	M.16.43	841751	850437	0.9966	0.9246						x				x
40	M.16.40	879449	887316	0.9996	1								x		x
41	M.16.02	2320203	2330432	0.9994	1.0001									x			x	x
42	M.16.4	120438	132320	0.9841	0.7696	v									x	x	x	x
43	M.16.02	397530	454399	0.9985	0.8827									x	x
44	M.16.43	809197	823105	0.9983	1		x	x		x	x		x
45	M.16.30	2570261	2576215	0.9983	0.9596		x	x	x	x		x	x
46	M.16.30	847027	863690	0.9937	0.9228		x	x	x	x		x	x				x	x
47	M.16.47	858553	878477	0.9977	0.9163		x	x	x	x		x	x				x	x
48	M.16.43	865762	875997	0.9945	1		x	x	x	x	x	x		x		x	x	x
A The genome name, and start and stop coordinates in which the variable fragment was the longest. B Average nucleotide identity over the portion of the segment covered by all strains that share it. C. Average coverage of the longest segment in the genomes that share it. D. v indicates segments that appear to be viruses. pl indicates segments that appear to be plasmids. X identifies strains that m…
