# Supplementary material for: Patterns of Gene Flow Define Species of Thermophilic Archaea
Source: PLoS Biol. 2012 Feb 21;10(2):e1001265. doi: 10.1371/journal.pbio.1001265 (PMC3283564; doi:10.1371/journal.pbio.1001265)
Supplement: Table S4 — Variable genome segments among 12 S. islandicus genomes. (XLSX) [file pbio.1001265.s007.xlsx]

## Sheet: Sheet1
Table S4. Sequencing statics for ten new S. islandicus genomes
Name	Size (Mbp)	Contig number	Number of reads	Average coverage
M.16.46	2.69*	2	117,269a	17.1X
M.16.13	2.63*	3	134,572a	19.0X
M.16.47	2.64	1	570,787b	48.5X
M.16.23	2.6	1	376,424b	38.7X
M.16.30	2.61*	4	124,457a	18.9X
M.16.43	2.59	1	386,677b	39.3X
M.16.12	2.69*	3	135,420a	20.7X
M.16.22	2.68*	3	570,739b	51.2X
M.16.02	2.65	1	268,715b	28.3X
M.16.40	2.67	1	348,469b	35.4X
a reads originated from shotgun single-read 454 run. b reads originated from a shotgun single-read 454 run and a paired-end 454 run.
